# Supplementary material for: L-Arginine/Nitric Oxide Pathway Is Altered in Colorectal Cancer and Can Be Modulated by Novel Derivatives from Oxicam Class of Non-Steroidal Anti-Inflammatory Drugs
Source: MDPI journal article supplement (doi:10.3390/cancers12092594), 2020-09-11
Supplement: s1 [file s1]

Supplementary Material; Krzystek-Korpaczka et al.

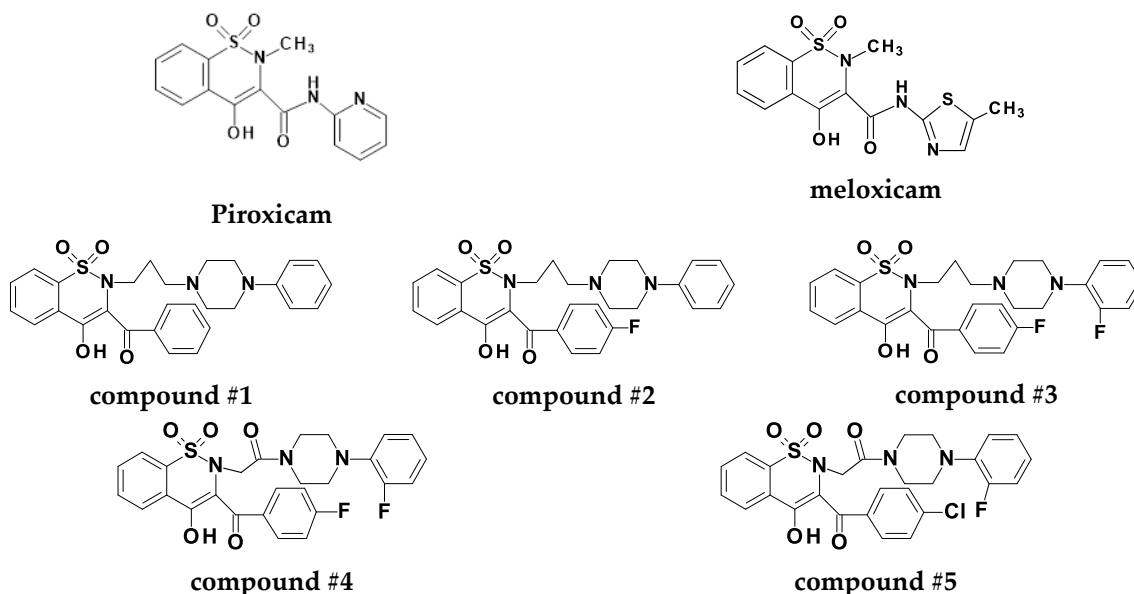

Figure S1. Structures of classic and new oxamic acid analogues.

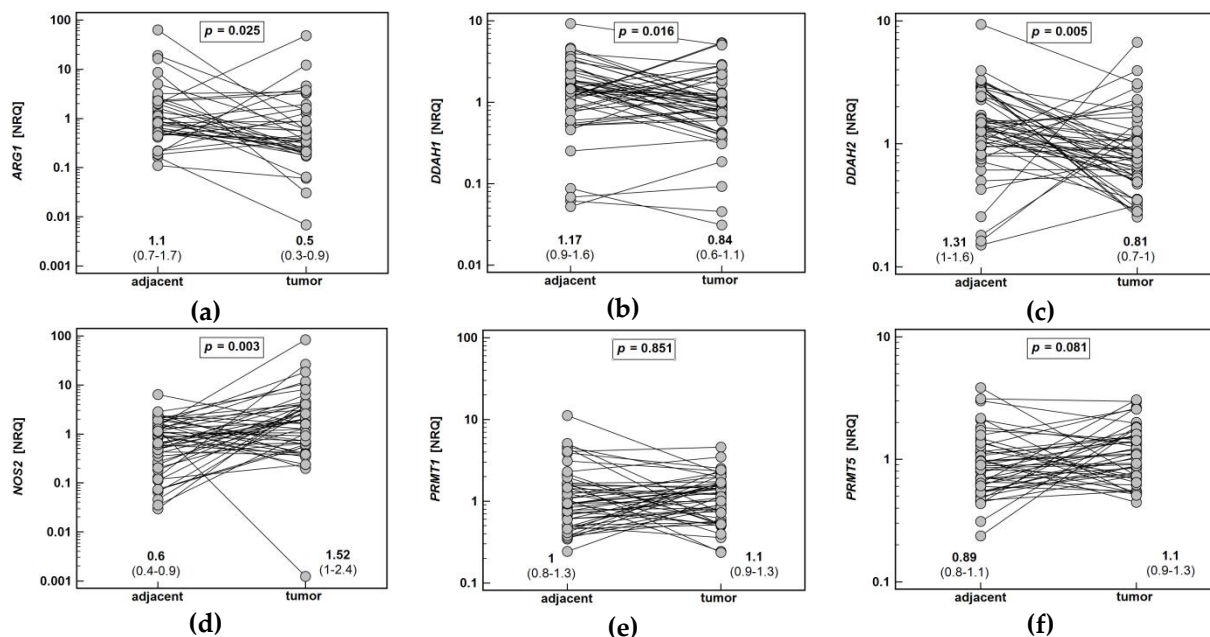

Figure S2. Pairwise (patient-matched) analysis of expression of arginine/nitric oxide pathway enzymes in patients with colorectal adenocarcinomas: (a) ARG1; (b) DDAH1; (c) DDAH2; (d) NOS2; (e) PRMT1; (f) PRMT5. Log-transformed data were analyzed using *t*-test for paired samples and additionally presented as geometric mean of normalized relative quantities (NRQ) with 95% confidence interval. ARG2, arginase 2; DDAH, dimethylarginine dimethylaminohydrolase; NOS2, inducible nitric oxide synthase; PRMT, protein methyltransferase.

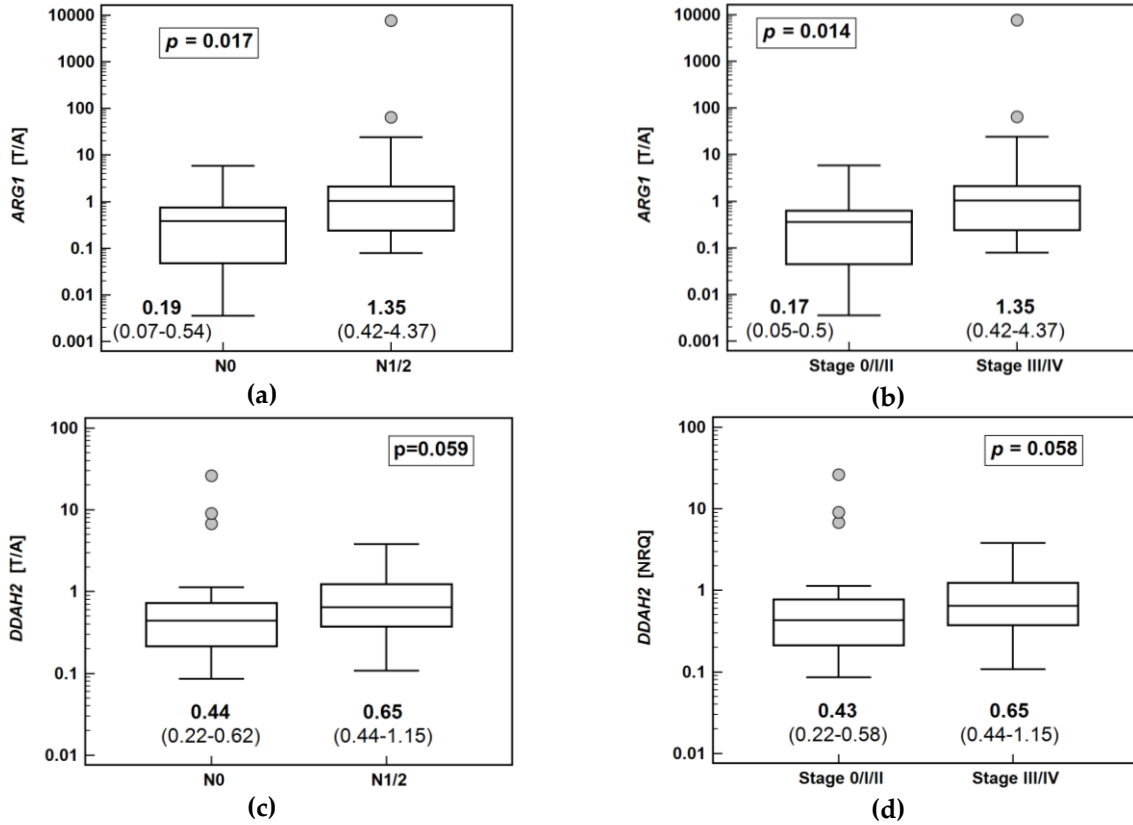

**Figure S3.** Fold-change (tumor-to-adjacent ratio; T/A) in expression of arginine/nitric oxide pathway enzymes in patients with colorectal adenocarcinomas in relation to cancer pathological features: (a) *ARG1* association with lymph node metastasis (N); (b) *ARG1* association with cancer stage; (c) *DDAH2* association with lymph node metastasis; (d) *DDAH2* association with cancer stage. Data analyzed using *t*-test for independent samples (*ARG1*) or Mann-Whitney *U*-test (*DDAH2*) and numeric data resnet, respectively, means or medians with 95% confidence interval. Boxes indicate interquartile range with median, whiskers – 95% confidence interval; grey dots – outlying observations. *ARG2*, arginase 2; *DDAH2*, dimethylarginine dimethylaminohydrolase 2.

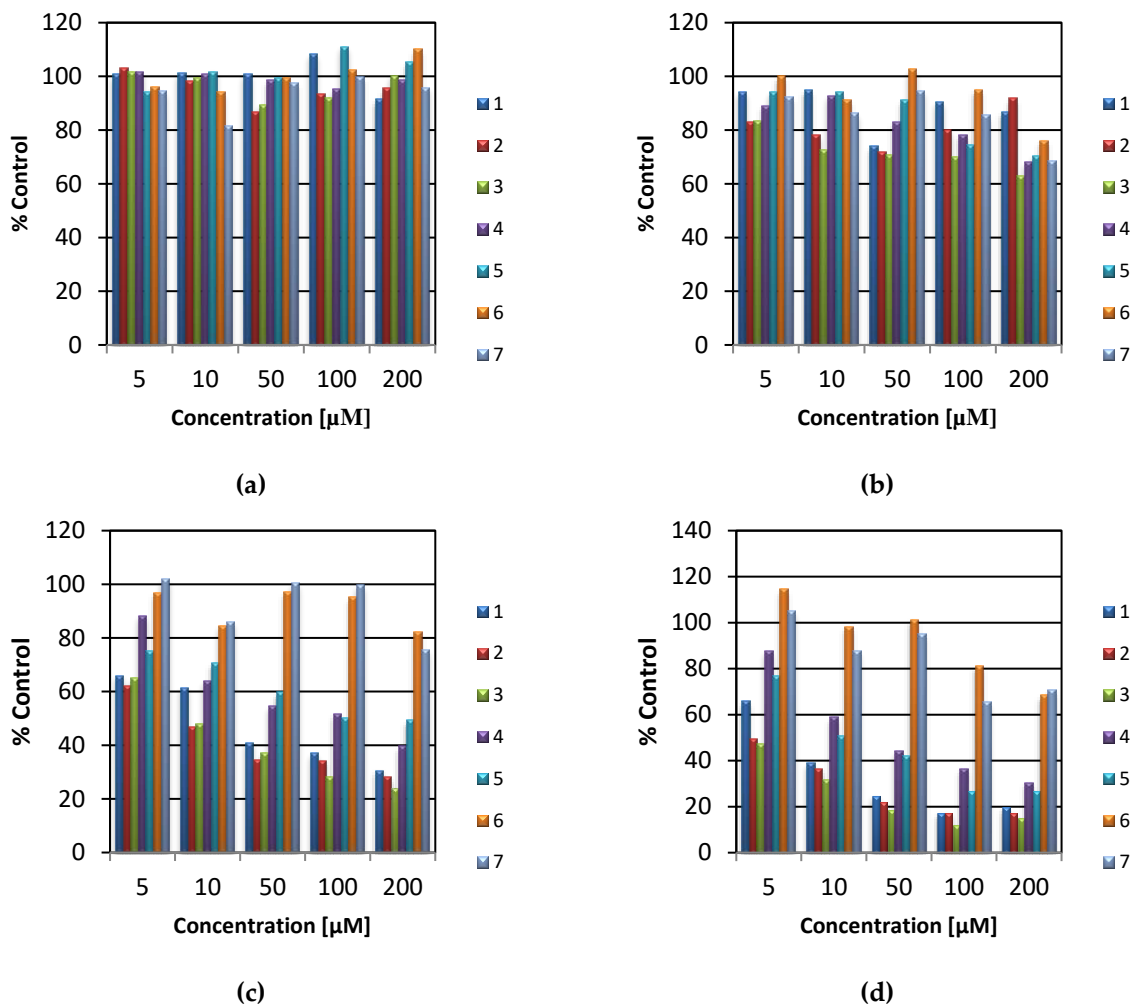

**Figure S4.** Impact of oxicams on Caco-2 cell viability determined with sulforhodamine B assay: (a) cells treated for 6 hours; (b) cells treated for 24 hours; (c) cells treated for 48 hours; (d) cells treated for 72 hours. Compounds #1-5 (novel oxicam analogues) marked as numbers 1-5, piroxicam marked as 6 and meloxicam marked as 7. Data presented as percentage (% control) of viability of untreated cells.

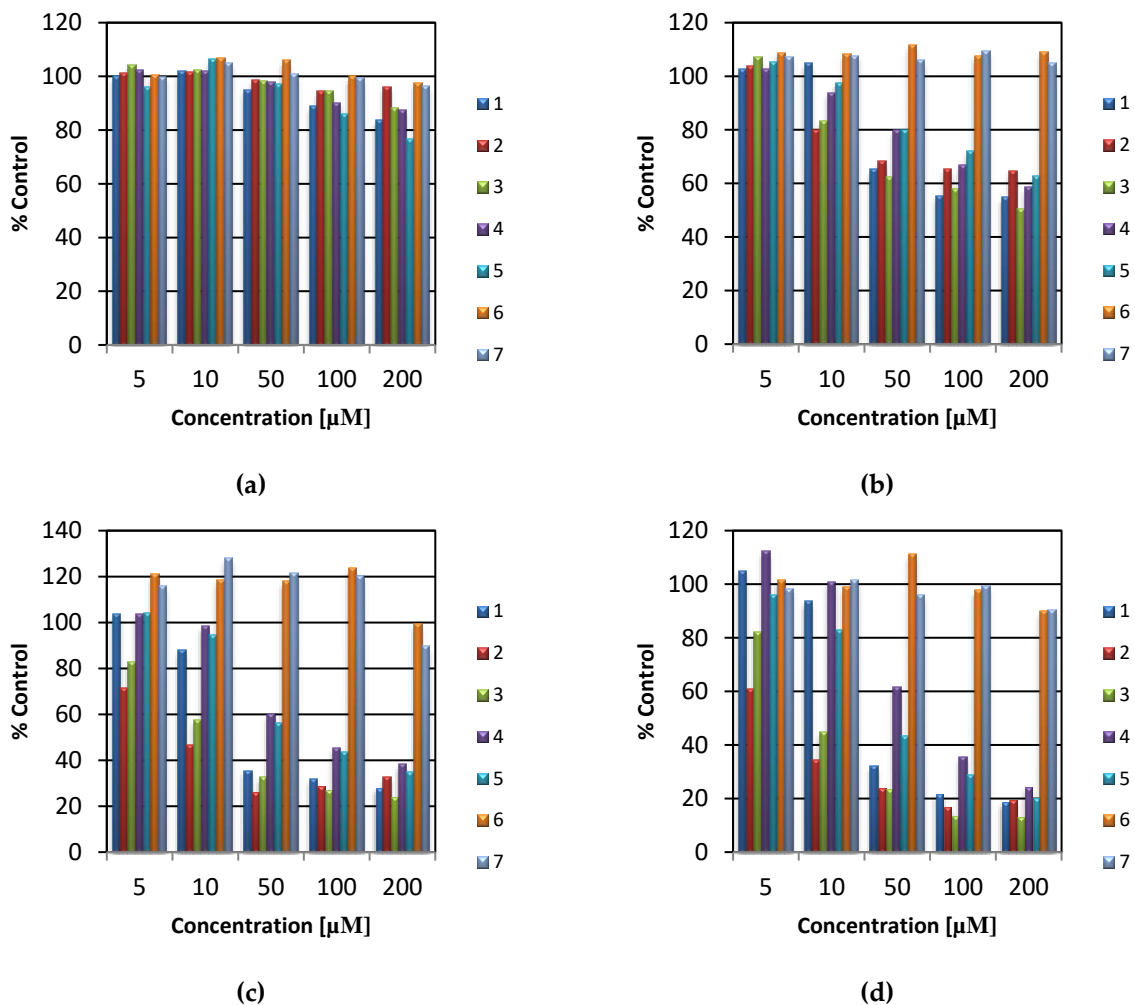

**Figure S5.** Impact of oxicams on HCT 116 cell viability determined with sulforhodamine B assay: (a) cells treated for 6 hours; (b) cells treated for 24 hours; (c) cells treated for 48 hours; (d) cells treated for 72 hours. Compounds #1-5 (novel oxicam analogues) marked as numbers 1-5, piroxicam marked as 6 and meloxicam marked as 7. Data presented as percentage (% control) of viability of untreated cells.

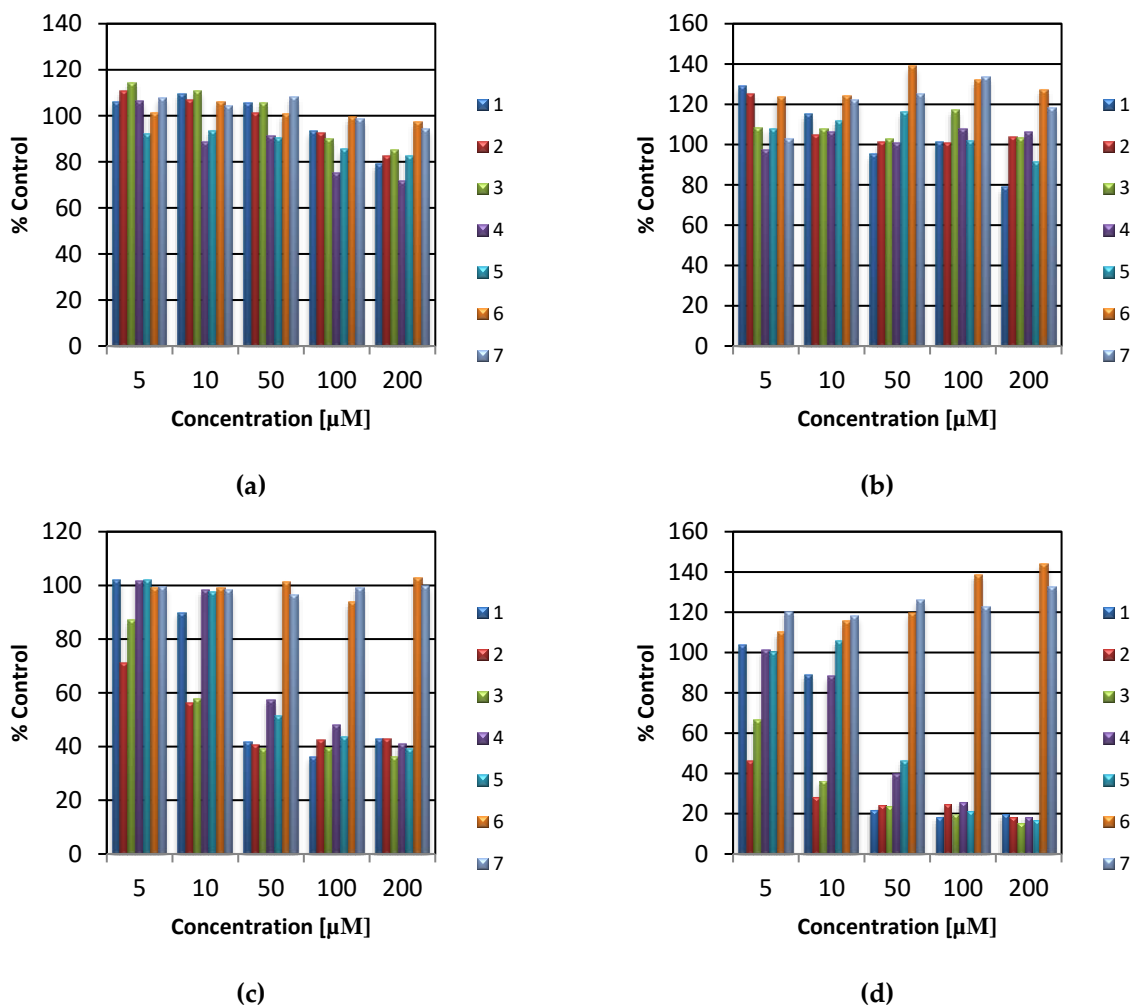

**Figure S6.** Impact of oxicams on HT-29 cell viability determined with sulforhodamine B assay: (a) cells treated for 6 hours; (b) cells treated for 24 hours; (c) cells treated for 48 hours; (d) cells treated for 72 hours. Compounds #1-5 (novel oxicam analogues) marked as numbers 1-5, piroxicam marked as 6 and meloxicam marked as 7. Data presented as percentage (% control) of viability of untreated cells.

**Table S1.** Effect of novel oxicam analogues on L-arginine/nitric oxide pathway enzymes

| Gene  | Comp. | 5 $\mu$ M 72h                 |                               |                    | 200 $\mu$ M 6h                |                               |                               |
|-------|-------|-------------------------------|-------------------------------|--------------------|-------------------------------|-------------------------------|-------------------------------|
|       |       | Caco-2                        | HCT-116                       | HT 29              | Caco-2                        | HCT-116                       | HT 29                         |
| ARG2  | #1    | -                             | -                             | -                  | =                             | $\uparrow$ 1.6 <sup>1</sup>   | $\uparrow$ (2.5)              |
|       | #2    | -                             | -                             | -                  | =                             | =                             | $\uparrow$ (3.4)              |
|       | #3    | -                             | -                             | -                  | =                             | =                             | $\uparrow$ 3.5 <sup>1</sup>   |
|       | #4    | =                             | $\downarrow$ 1.3 <sup>1</sup> | =                  | =                             | $\uparrow$ (1.4)              | =                             |
|       | #5    | =                             | =                             | =                  | =                             | =                             | $\uparrow$ 2.6 <sup>1</sup>   |
|       | P     | =                             | =                             | =                  | =                             | =                             | =                             |
| DDAH1 | M     | =                             | $\downarrow$ 1.5 <sup>1</sup> | $\downarrow$ (2.3) | =                             | =                             | =                             |
|       | #1    | -                             | -                             | -                  | =                             | =                             | =                             |
|       | #2    | -                             | -                             | -                  | =                             | =                             | =                             |
|       | #3    | -                             | -                             | -                  | =                             | =                             | $\downarrow$ 1.3 <sup>1</sup> |
|       | #4    | =                             | =                             | =                  | =                             | $\downarrow$ (1.3)            | =                             |
|       | #5    | =                             | =                             | =                  | =                             | $\downarrow$ (1.4)            | =                             |
| DDAH2 | P     | =                             | =                             | =                  | =                             | =                             | =                             |
|       | M     | =                             | =                             | =                  | =                             | =                             | $\uparrow$ 1.1 <sup>1</sup>   |
|       | #1    | -                             | -                             | -                  | =                             | =                             | =                             |
|       | #2    | -                             | -                             | -                  | $\downarrow$ (1.9)            | =                             | =                             |
|       | #3    | -                             | -                             | -                  | =                             | =                             | =                             |
|       | #4    | =                             | =                             | =                  | =                             | $\downarrow$ 1.5 <sup>1</sup> | ( $\downarrow$ 1.4)           |
| NOS2  | #5    | =                             | =                             | =                  | =                             | =                             | =                             |
|       | P     | =                             | =                             | =                  | =                             | =                             | =                             |
|       | M     | =                             | $\downarrow$ 1.3 <sup>2</sup> | $\downarrow$ (1.6) | =                             | =                             | =                             |
|       | #1    | -                             | -                             | -                  | =                             | -                             | -                             |
|       | #2    | -                             | -                             | -                  | $\downarrow$ (2.3)            | -                             | -                             |
|       | #3    | -                             | -                             | -                  | =                             | -                             | -                             |
| PRMT1 | #4    | =                             | -                             | -                  | =                             | -                             | -                             |
|       | #5    | =                             | -                             | -                  | =                             | -                             | -                             |
|       | P     | =                             | -                             | -                  | =                             | -                             | -                             |
|       | M     | =                             | -                             | -                  | =                             | -                             | -                             |
|       | #1    | -                             | -                             | -                  | =                             | =                             | =                             |
|       | #2    | -                             | -                             | -                  | =                             | =                             | =                             |
| PRMT5 | #3    | -                             | -                             | -                  | =                             | =                             | $\downarrow$ 1.3 <sup>1</sup> |
|       | #4    | =                             | =                             | =                  | $\downarrow$ 1.2 <sup>1</sup> | =                             | =                             |
|       | #5    | =                             | =                             | =                  | $\downarrow$ 1.3 <sup>1</sup> | =                             | =                             |
|       | P     | =                             | =                             | =                  | $\downarrow$ (1.3)            | =                             | =                             |
|       | M     | =                             | =                             | =                  | =                             | =                             | =                             |
|       | #1    | -                             | -                             | -                  | =                             | =                             | =                             |
| PRMT5 | #2    | -                             | -                             | -                  | =                             | =                             | =                             |
|       | #3    | -                             | -                             | -                  | =                             | =                             | $\downarrow$ (1.1)            |
|       | #4    | $\downarrow$ 1.1 <sup>1</sup> | $\downarrow$ (1.4)            | $\downarrow$ (1.1) | =                             | $\downarrow$ 1.3 <sup>1</sup> | =                             |
|       | #5    | =                             | =                             | =                  | =                             | =                             | =                             |
|       | P     | $\downarrow$ (1.2)            | =                             | =                  | =                             | =                             | =                             |
|       | M     | =                             | $\downarrow$ 1.4 <sup>1</sup> | =                  | =                             | =                             | $\uparrow$ (1.2)              |

Results of paired analysis showing a fold increase ( $\uparrow$ ) or decrease ( $\downarrow$ ) in gene expression normalized to *GAPDH* in treated as compared to non-treated cells (72-hour incubation with 5  $\mu$ M drugs or 6-hour incubation with 200 5  $\mu$ M drugs). Data present mean of three independent experiments and were analyzed using *t*-test for paired samples. Comp., compound; P, piroxicam; M, meloxicam; ARG2, arginase 2; DDAH, dimethylarginine dimethylaminohydrolase; NOS2, inducible nitric oxide synthase; PRMT, protein methyltransferases. <sup>1</sup>  $p < 0.05$ ; <sup>2</sup>  $p < 0.01$ ; =, no significant difference or tendency ( $p \geq 0.1$ ); - non-quantifiable. Tendencies ( $0.05 < p < 0.1$ ) are given in brackets.

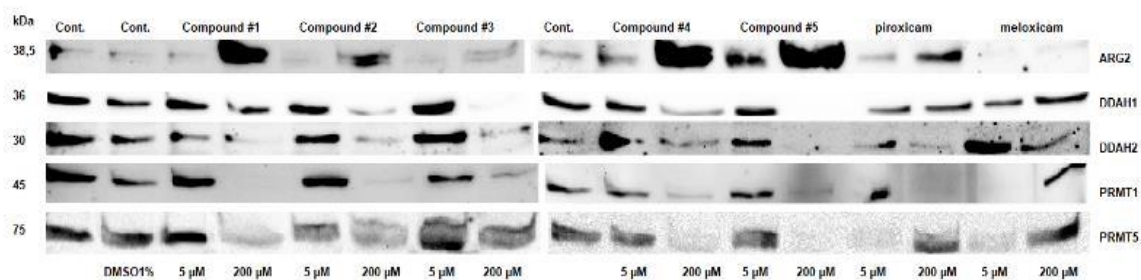

**Figure S7.** Western Blot analysis of protein expression level of ARG2, DDAH1, DDAH2, PRMT1, PRMT5 in HT-29. Cells were treated with the indicated concentrations (5 or 200  $\mu$ M) of compounds #1-5, piroxicam, and meloxicam for 48 hours. The blots were processed and cropped using Image Lab software. Cont., untreated cells (incubated with 1% dimethyl sulfoxide (DMSO) in case of compound #1); ARG2, arginase 2; DDAH, dimethylarginine dimethylaminohydrolase; PRMT, protein methyltransferase.

**Table S2.** Effect of classic and novel oxicam analogues on intracellular levels of key metabolites of L-arginine/NO pathway

| Metabolite | Comp. | 5 $\mu$ M 72h      |                    |       | 200 $\mu$ M 6h |                    |                   |
|------------|-------|--------------------|--------------------|-------|----------------|--------------------|-------------------|
|            |       | Caco-2             | HCT-116            | HT 29 | Caco-2         | HCT-116            | HT 29             |
| Arg        | #1    | -                  | -                  | -     | -              | ↑ (1.1)            | ↑1.8 <sup>1</sup> |
|            | #2    | -                  | -                  | -     | -              | =                  | =                 |
|            | #3    | -                  | -                  | -     | -              | =                  | =                 |
|            | #4    | =                  | ↓(1.2)             | =     | -              | =                  | =                 |
|            | #5    | =                  | =                  | =     | -              | =                  | =                 |
|            | P     | =                  | =                  | =     | -              | =                  | =                 |
|            | M     | =                  | =                  | =     | -              | =                  | =                 |
| Cit        | #1    | -                  | -                  | -     | -              | =                  | =                 |
|            | #2    | -                  | -                  | -     | -              | ↑ (1.1)            | =                 |
|            | #3    | -                  | -                  | -     | -              | =                  | =                 |
|            | #4    | ↑ (1.1)            | ↓ 1.1 <sup>2</sup> | =     | -              | =                  | =                 |
|            | #5    | ↑ 1.1 <sup>2</sup> | =                  | =     | -              | =                  | =                 |
|            | P     | =                  | =                  | =     | -              | =                  | =                 |
|            | M     | =                  | =                  | =     | -              | =                  | =                 |
| ADMA       | #1    | -                  | -                  | -     | -              | =                  | ↑1.6 <sup>1</sup> |
|            | #2    | -                  | -                  | -     | -              | ↑ 1.1 <sup>1</sup> | =                 |
|            | #3    | -                  | -                  | -     | -              | =                  | =                 |
|            | #4    | =                  | =                  | =     | -              | =                  | =                 |
|            | #5    | =                  | =                  | =     | -              | =                  | =                 |
|            | P     | =                  | =                  | =     | -              | =                  | =                 |
|            | M     | =                  | =                  | =     | -              | =                  | =                 |
| SDMA       | #1    | -                  | -                  | -     | -              | =                  | ↑1.8 <sup>1</sup> |
|            | #2    | -                  | -                  | -     | -              | =                  | =                 |
|            | #3    | -                  | -                  | -     | -              | =                  | =                 |
|            | #4    | =                  | ↓ (1.3)            | =     | -              | =                  | =                 |
|            | #5    | =                  | =                  | =     | -              | =                  | =                 |
|            | P     | =                  | =                  | =     | -              | =                  | =                 |
|            | M     | =                  | =                  | =     | -              | =                  | =                 |
| DMA        | #1    | -                  | -                  | -     | -              | =                  | =                 |
|            | #2    | -                  | -                  | -     | -              | =                  | =                 |
|            | #3    | -                  | -                  | -     | -              | =                  | =                 |
|            | #4    | =                  | =                  | =     | -              | ↓ (1.1)            | =                 |
|            | #5    | ↓ (1.2)            | =                  | =     | -              | =                  | =                 |
|            | P     | =                  | =                  | =     | -              | =                  | =                 |
|            | M     | =                  | =                  | =     | -              | =                  | =                 |
| Orn        | #1    | -                  | -                  | -     | -              | =                  | ↑1.1 <sup>1</sup> |
|            | #2    | -                  | -                  | -     | -              | =                  | =                 |
|            | #3    | -                  | -                  | -     | -              | =                  | =                 |
|            | #4    | ↑                  | ↓ 1.3 <sup>1</sup> | =     | -              | =                  | =                 |
|            | #5    | ↑ (1.1)            | =                  | =     | -              | =                  | =                 |
|            | P     | =                  | =                  | =     | -              | =                  | =                 |
|            | M     | =                  | =                  | =     | -              | =                  | =                 |

Results of paired analysis showing a fold increase (↑) or decrease (↓) in metabolite concentration adjusted to protein content in treated as compared to non-treated cells (72-hour incubation with 5  $\mu$ M drugs or 6-hour incubation with 200 5  $\mu$ M drugs). Data present mean of three independent experiments and were analyzed using *t*-test for paired samples. Comp., compound; Arg, arginine; Cit, citrulline; ADMA, asymmetric dimethylarginine; SDMA, symmetric dimethylarginine; DMA, dimethylamine; Orn, ornithine; P, piroxicam; M, meloxicam; <sup>1</sup>  $p < 0.05$ ; <sup>2</sup>  $p < 0.01$ ; =, no significant difference or tendency ( $p \geq 0.1$ ). Tendencies ( $0.05 < p < 0.1$ ) are given in brackets.
